# Supplementary material for: ZNF139/circZNF139 promotes cell proliferation, migration and invasion via activation of PI3K/AKT pathway in bladder cancer
Source: publisher site journal article supplement (doi:10.18632/aging.103256), 2020-05-26
Supplement: Supplementary file [file aging-v12i10-103256-supplementary-material-SD1.pdf]

## SUPPLEMENTARY FIGURES

| organism | position (genome browser link) | strand | circRNA ID       | genom e length | spliced length | samples                                                                                                                                                                                                                                                                                                                                                                | scores                                                                                                                                                       | repeats | annotation                                              | best transcript    | gene symbol | circRNA study                                           |
|----------|--------------------------------|--------|------------------|----------------|----------------|------------------------------------------------------------------------------------------------------------------------------------------------------------------------------------------------------------------------------------------------------------------------------------------------------------------------------------------------------------------------|--------------------------------------------------------------------------------------------------------------------------------------------------------------|---------|---------------------------------------------------------|--------------------|-------------|---------------------------------------------------------|
| hsa      | chr7:99621041-99621930         | +      | has_circ_0001727 | 889            | 668            | Hs68_control, Hs68_Rnase, adipose, EPC, HIAEC, LCL, platelets, WAS2, cd_19, cd_34, HEK293, cerebellum, diencephalon, frontal_cortex, occipital_lobe, parietal_lobe, Sy5y_exp1_D0, Sy5y_exp1_D2, Sy5y_exp1_D4, SY5Y_exp2_D0, SY5Y_exp2_D4, SY5Y_exp2_D8, temporal_lobe, A549, Aq04450, Bj, Gm12878, H1hesc, Helas3, Hepg2, Hamm, Huvec, K562, MCF7, Nhek, Nhlh, Sknshra | 61, 1247, 4, 4, 2, 5, 5, 7, 19, 11, 2, 250, 425, 2029, 1427, 570, 37, 22, 18, 24, 9, 7, 911, 148, 134, 114, 155, 150, 112, 119, 15, 39, 198, 47, 243, 3, 198 | None    | ANNOTATED, CDS, coding, INTERNAL, OVCODE, OVEEXON, UTRS | NM_003439          | ZKSCAN1     | Jeck2013, Maas2017, Memczak2013, Rybak2015, Salzman2013 |
| mmu      | chr6:138534147-138535367       | +      | mmu_circ_0012225 | 1220           | 661            | forebrain, olfactory_bulb                                                                                                                                                                                                                                                                                                                                              | 17, 2                                                                                                                                                        | NA      | ANNOTATED, CDS, coding, INTERNAL, OVCODE, OVEEXON, UTRS | ENSMUST00000019660 | Zkscan1     | Rybak2015                                               |
| hsa      | chr7:99621041-99627998         | +      | has_circ_0135233 | 6957           | 887            | frontal_cortex                                                                                                                                                                                                                                                                                                                                                         | 9                                                                                                                                                            | NA      | ANNOTATED, CDS, coding, INTERNAL, OVCODE, OVEEXON, UTRS | ENST00000324306.6  | ZKSCAN1     | Rybak2015                                               |
| hsa      | chr7:99633596-99633895         | -      | has_circ_0135235 | 209            | 2019           | temporal_lobe                                                                                                                                                                                                                                                                                                                                                          | 7                                                                                                                                                            | NA      | ANTISENSE, Coding, INTERNAL, OVEEXON, UTRS              | ENST00000324306.6  | ZKSCAN1     | Rybak2015                                               |

**Supplementary Figure 1.** The expression of circRNAs formed by *ZNF139* in various samples in accordance with the search of *ZNF139* in circBase (<http://www.circbase.org/>) database. The red box indicates the circZNF139 (circRNA ID: hsa\_circ\_0001727) with 668 nt spliced length who has the widest expression spectrum. ZNF139, zinc finger with KRAB and SCAN domains 1; circ, circular.

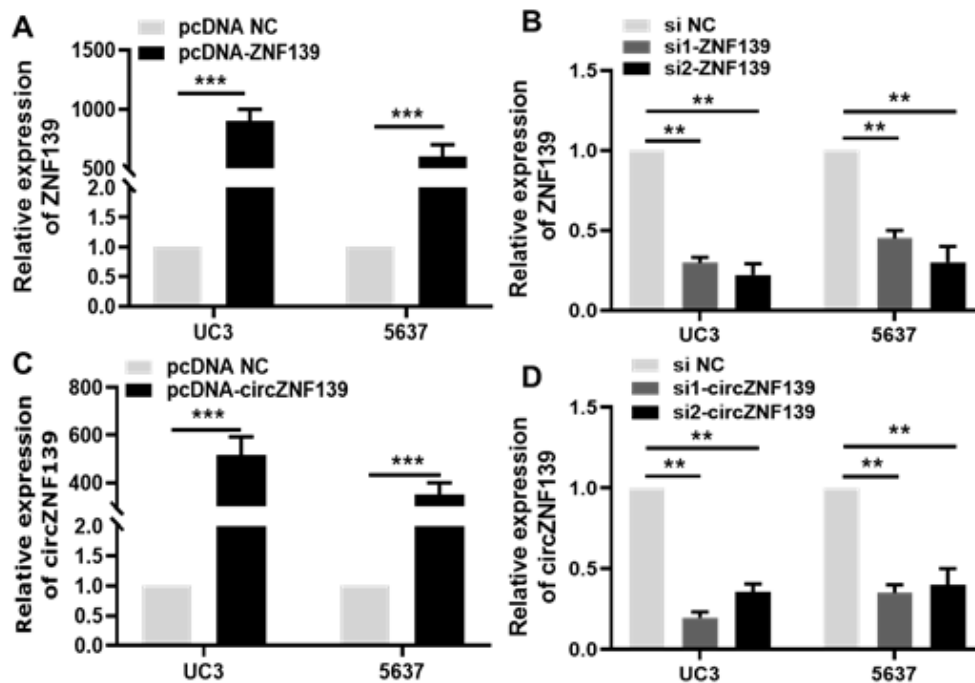

**Supplementary Figure 2.** The overexpression and knockdown efficiencies of *ZNF139/circZNF139* were detected in UC3 and 5637 cells by qRT-PCR assay. (A–B) The expression of ZNF139 was measured in UC3 and 5637 cells after respectively transfected with pcDNA-ZNF139/pcDNA NC, or si1-ZNF139/si2-ZNF139/si NC. (C–D) The expression of circZNF139 was measured in UC3 and 5637 cells after respectively transfected with pcDNA-circZNF139/pcDNA NC, or si1-circZNF139/si2-circZNF139/si NC. \*\*,  $P < 0.01$ ; \*\*\*,  $P < 0.001$ . circ, circular; ZNF139, zinc finger with KRAB and SCAN domains 1; qRT-PCR, quantitative real-time polymerase chain reaction; NC, negative control; si, small interfering.
